# Supplementary material
Source: PubMed Central journal article supplement (PMC6246241)
Supplement: mdx308_sg-bcc_2017_coi_baselga.pdf [file mdx308_sg-bcc_2017_coi_baselga.pdf]

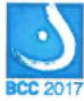

## Conflict of Interest Disclosure Form

(Complete years 2015 and 2016)

NAME: José Baselga

AFFILIATION: *Memorial Sloan Kettering Cancer Center*

### DISCLOSURE

I have no potential conflict of interest to report

I have the following potential conflict(s) of interest to report

| Type of affiliation / financial interest               | Name of commercial company |
|--------------------------------------------------------|----------------------------|
| Travel                                                 |                            |
| Equity / stock ownership                               |                            |
| Ownership/profit out of intellectual property / patent |                            |
| Grants/Research support – to individual                |                            |
| Research support – to department / institution*        |                            |
| Receipt of honoraria or consultation fees              | <i>NOVARTIS</i>            |
| Participation in a company sponsored speaker's bureau  |                            |
| Spouse/partner                                         |                            |
| Other support (please specify)                         |                            |

Signature:

Date: *11/30/16*

*Baselga*

\* Patient fees directly related to handling and documentation of cases included in clinical studies in your department need not to be declared.
